# Supplementary material for: A Multi-Gene Region Targeted Capture Approach to Detect Plant DNA in Environmental Samples: A Case Study From Coastal Environments
Source: Frontiers journal article supplement (doi:10.3389/fevo.2021.735744), 2021-10-25
Supplement: Data_Sheet_1.docx [file Data_Sheet_1.docx]

Supplementary Material

# Supplementary methods

### Discriminatory power test: CD-HIT-EST clustering and custom R script

FASTA files for both the 10 species artificial mixture and proof-of-concept (section 2.4 of main text), were clustered with the wider reference database using CD-HIT-EST (Li & Godzik, 2006; Fu et al., 2012). A flow diagram for this analysis is outlined in Figure S1 including the read processing and mapping steps.


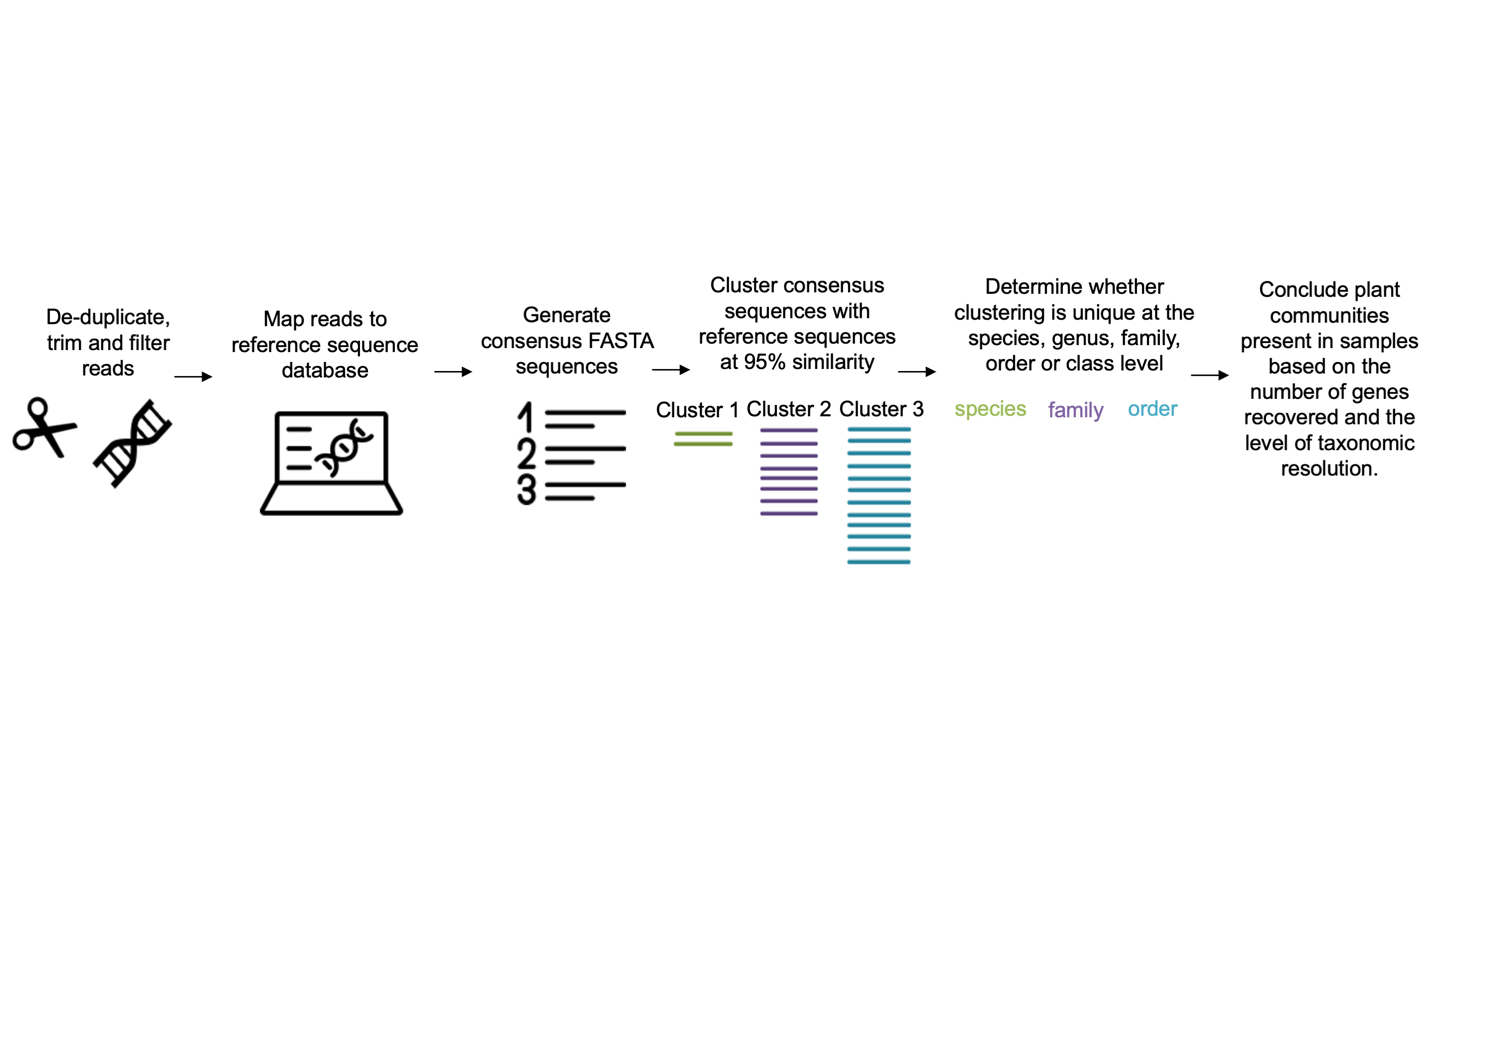


Figure S1. Flow diagram depicting the series of analytical steps used to determine plant community composition in the discriminatory power trial and the proof-of-concept trial.

The threshold for sequence identity was set to 0.95, length and clustering of sequences was specified to cluster at the most similar cluster (-g 1) and alignment was set to cover at least 10% of the representative sequence and 90% of the shorter sequence (-aL 0.1 -aS 0.9). A custom script was written in R version 3.5.1 (R Core Team 2018), using packages taxize (Chamberlain and Szocs, 2013), TAI (Drost et al., 2018), dplyr (Wickham et al., 2020), stringi (Gagolewski et al. 2020), stringr (Wickham et al., 2019) and tidyr (Wickham and Henry, 2019). This script unpacked the output.clstr file from CD-HIT-EST and generated upstream taxonomic assignment for each sample, in each cluster. The data was then separated into each cluster and the script identified the highest common taxonomic ranking as an output. Each of the sample sequences were then separated so that the final dataset contained assigned sample taxonomy generated from the mapping of reads (section 2.4 of main text) and a ranking for the level of taxonomic clustering this sequence provided. This allowed us to determine whether the read mapping step and subsequent generation of FASTA files from our sample reads was an accurate determination of what was present in the mixture. If the sample sequence clustered broadly with other sequences, and thus the highest common taxonomic level was order or family, it meant either, the gene in question did not have enough discriminatory power/could not discern between species on its own, or the sample sequence reads did not contain enough genetic data to generate informative FASTA sequences i.e. read depth did not meet the assigned threshold to call a base and instead missing data values were inserted (N’s) and thus the length of the sequence was too short to be informative. This process helped us eliminate any mapping error and take into account the different discriminatory ability of chloroplast gene regions for the different flowering plant groups.

## References

Chamberlain S. & Szocs E.(2013). taxize - taxonomic search and retrieval in R. F1000Research, 2:191. \https://f1000research.com/articles/2-191/v2

Drost HG, Gabel A, Jiu J, Quint M, Grosse I (2018). myTAI: evolutionary transcriptomics with R. *Bioinformatics* doi:10.1093

Fu, L., Niu, B., Zhu, Z., Wu, S. & Li, W. (2012). CD-HIT: accelerated for clustering the next-generation sequencing data. *Bioinformatics,* 28**,** 3150-2.

Gagolewski M. (2020). R package stringi: Character string processing facilities. <http://www.gagolewski.com/software/stringi/>.

Li, W. & Godzik, A. (2006). Cd-hit: a fast program for clustering and comparing large sets of protein or nucleotide sequences. *Bioinformatics,* 22**,** 1658-9.

R Core Team (2018). R: A language and environment for statistical computing. R Foundation for Statistical Computing, Vienna, Austria. URL <https://www.R-project.org>

Wickham, H., François, R., Lionel H., Müller, K. (2020). dplyr: A Grammar of Data Manipulation. R package version 1.0.2. <https://CRAN.R-project.org/package=dplyr>

Wickham, H. (2019). stringr: Simple, Consistent Wrappers for Common String Operations. R package version 1.4.0. <https://CRAN.R-project.org/package=string>

Wickham, H., & Henry, L. (2019). tidyr: Tidy Messy Data. R package version 1.0.0.

<https://CRAN.R-project.org/package=tidyr>

# Supplementary Figures and tables

Table S1. List of target chloroplast gene regions screened for as ‘on target’ in the bait set used to target capture eDNA.

| **Gene** | **Name** |
| --- | --- |
| psbA | photosystem II protein D1 |
| matK | maturase K |
| psbK | photosystem II protein K |
| atpF | ATP synthase CF0 subunit I |
| atpH | ATP synthase CF0 subunit III |
| atpI | ATP synthase CF0 subunit IV |
| psbD | photosystem II protein D2 |
| psbZ | photosystem II protein Z |
| rbcL | ribulose-1,5-bisphosphate carboxylase/oxygenase large subunit |
| atpB | ATP synthase CF1 beta subunit |
| accD | acetyl-CoA carboxylase carboxyltransferase beta subunit |
| petA | cytochrome f |
| psbE-psbF | photosystem II cytochrome b559 alpha subunit/photosystem II cytochrome b559 beta subunit |
| psbN-psbH | photosystem II protein N/photosystem II phosphoprotein |
| petD | cytochrome b6/f complex subunit IV |
| rpl14-rpl16 | ribosomal protein L14/ribosomal protein L16 |
| rpoC1 | β subunit of RNA polymerase |
| ndhK | NADH-plastoquinone oxidoreductase subunit K |
| ndhF | NADH-plastoquinone oxidoreductase subunit 5 |
| ndhC | NADH-plastoquinone oxidoreductase subunit 3 |

Table S2. Summary of DNA concentration (ng/µL) and collection information for samples used in the sensitivity assessment (section 2.1.1 from main text) and discriminatory power (section 2.1.2 from main text)

| **Species** | **Concentration (ng/µL)** | **Collection date** | **Country** | **Location** | **Latitude** | **Longitude** | **Specimen voucher number** |
| --- | --- | --- | --- | --- | --- | --- | --- |
| *Avicennia marina* | 9.72 | 00/12/2017 | Australia | South Australia St. Kilda | -34.73 | 138.52 | AD284320 |
| *Tecticornia flabelliformis* | 11.35 | 00/02/2018 | Australia | South Australia Middle Beach | -32.87 | 134.11 | AD284322 |
| *Zostera marina* | 0.22 | 14/04/1975 | Australia | Washington, Stanley, Park B.C. | 47.54 | -122.84 | AD283375 |
| *Posidonia australis* | 1.86 | 25/11/2009 | Australia | Rottnest Island, Stark Bay, WA | -32.26 | 115.70 | AD272341 |
| *Wilsonia humilis* | 1.89 | 00/02/2018 | Australia | South Australia Port Gawler | -34.65 | 138.45 | AD284323 |
| *Sarcocornia blackenia* | 4.97 | 00/02/2018 | Australia | South Australia Port Gawler | -34.73 | 138.52 | AD284325 |
| *Samolus repens* | 2.20 | 00/02/2018 | Australia | South Australia Port Gawler | -34.65 | 138.45 | AD284324 |
| *Zostera muelleri* | 0.28 | 20/01/2015 | Australia | Stansbury SA | -34.91 | 137.81 | AD272441 |
| *Parapholis incurva* | 0.57 | 00/12/2017 | Australia | South Australia St. Kilda | -34.73 | 138.52 | AD284314 |
| *Disphyma crassifolium* | 0.63 | 00/02/2018 | Australia | South Australia St. Kilda | -34.73 | 138.52 | AD284333 |
| *Tecticornia halocnemoides* | 1.35 | 00/12/2017 | Australia | South Australia St. Kilda | -34.60 | 138.41 | AD284315 |
| *Frankenia pauciflora* | 2.51 | 00/12/2017 | Australia | South Australia St. Kilda | -34.73 | 138.52 | AD284313 |

Table S3. Summary of raw, filtered and mapped reads for the sensitivity assessment (Section 3.1 of main text).

|  |  | **Sample conc ng/µl** | **Total number of reads** | **Reads after filtering** | **Reads mapped before removing PCR duplicates** | **Reads mapped after removing PCR duplicates** |
| --- | --- | --- | --- | --- | --- | --- |
| **restricted** | **Rep1** | 1 | 22629980 | 17290085 | 9029998 | 1077951 |
| 0.1 | 4974838 | 3832898 | 1993029 | 274094 |
| 0.01 | 472482 | 723012 | 313186 | 41729 |
| 0.001 | 4480408 | 7709131 | 896009 | 8712 |
| 0.0001 | 98207 | 174376 | 4807 | 915 |
| **Rep2** | 1 | 42488364 | 32851172 | 17478695 | 1773158 |
| 0.1 | 1982450 | 1526600 | 750641 | 94012 |
| 0.01 | 4053066 | 274074 | 5463564 | 50076 |
| 0.001 | 1607459 | 2549181 | 1062429 | 19411 |
| 0.0001 | 87572 | 152861 | 2191 | 433 |
| **Rep3** | 1 | 12708214 | 9893864 | 4955279 | 580195 |
| 0.1 | 3311566 | 2535517 | 1275934 | 164921 |
| 0.01 | 32902104 | 25163924 | 22090426 | 130102 |
| 0.001 | 1641021 | 2338448 | 1793728 | 15215 |
| 0.0001 | 76006 | 132990 | 2667 | 387 |
| **wider** | **Rep1** | 1 | 22629980 | 17290085 | 9042110 | 2798334 |
|  | 0.1 | 4974838 | 3832898 | 1996113 | 659723 |
|  | 0.01 | 472482 | 723012 | 313108 | 133033 |
|  | 0.001 | 4480408 | 7709131 | 890667 | 59449 |
|  | 0.0001 | 98207 | 174376 | 5044 | 1293 |
| **Rep2** | 1 | 42488364 | 32851172 | 17502967 | 4741862 |
|  | 0.1 | 1982450 | 1526600 | 751435 | 242317 |
|  | 0.01 | 4053066 | 6274074 | 5470707 | 166030 |
|  | 0.001 | 1607459 | 2549181 | 1063092 | 73899 |
|  | 0.0001 | 87572 | 152861 | 2218 | 496 |
| **Rep3** | 1 | 12708214 | 9893864 | 4961874 | 513990 |
|  | 0.1 | 3311566 | 2535517 | 1278140 | 414096 |
|  | 0.01 | 32902104 | 25163924 | 22117982 | 536016 |
|  | 0.001 | 1641021 | 2338448 | 1793428 | 105296 |
|  | 0.0001 | 76006 | 132990 | 3042 | 696 |

Table S4. Sensitivity assessment. A quasibinomial distributed Generalised Linear Model was fit to the data specifying species, reference and concentration as factors and including interaction terms. An ANOVA was then conducted on the model and the output is shown below

Df Deviance Resid. Df Resid. Dev F Pr(>F)

NULL 89 79.621

conc 4 56.74 85 22.88 333.00 **< 2.2e-16**

species 2 17.85 83 5.026 210.19 **< 2.2e-16**

reference 1 0.002 82 5.024 0.036 0.85

conc:species 8 1.802 74 3.22 5.31 **3.503e-05**

conc:reference 4 0.017 70 3.21 0.10 0.98

species:reference 2 0.022 68 3.18 0.26 0.78

**Supplementary Figure 2.** **Species and gene recovery for all species recovered from the discriminatory power test in the main text, including both those species placed in the mixture and those that were not.**
